# Supplementary material for: In-situ monitoring of H2O2degradation by live cells using voltammetric detection in a lab-on-valve system
Source: Royal Society of Chemistry journal article supplement (doi:10.1039/b704188h), 2007-01-01
Supplement: b704188h.pdf [file b704188h.pdf]

## ESI Table 1: Software protocol for H<sub>2</sub>O<sub>2</sub> degradation measurements.

### ' Define ports. Inactivate trigger.

Hardware Settings portname (number, string) 1, waste  
Hardware Settings portname (number, string) 2, flowcell  
Hardware Settings portname (number, string) 3, blank  
Hardware Settings portname (number, string) 4, sample  
Hardware Settings portname (number, string) 5, spare  
Hardware Settings portname (number, string) 6, beads  
Analog:Digital Module TTL Line On (#) 0

### ' Load bead column.

Insert File C:\Bead load.fia

### ' Prime sample inlet.

SyringePump Valve In  
SyringePump Flowrate (microliter/sec) 50  
SyringePump Aspirate (microliter) 600  
SyringePump Delay Until Done  
SyringePump Valve Out  
Valve sample  
SyringePump Flowrate (microliter/sec) 20  
SyringePump Aspirate (microliter) 100  
SyringePump Delay Until Done  
SyringePump Flowrate (microliter/sec) 50  
Valve waste  
SyringePump Empty  
SyringePump Delay Until Done

### ' Fill pump. Aspirate sample.

SyringePump Valve In  
SyringePump Flowrate (microliter/sec) 100  
SyringePump Aspirate (microliter) 500  
SyringePump Delay Until Done  
SyringePump Valve Out  
Valve sample  
SyringePump Flowrate (microliter/sec) 20  
SyringePump Aspirate (microliter) 500  
SyringePump Delay Until Done

### ' Dispense sample solution into flowcell.

#### ' Trigger conditioning voltammogram.

SyringePump Flowrate (microliter/sec) 10  
Valve flowcell  
SyringePump Dispense (microliter) 200  
Delay (sec) 2  
Analog:Digital Module TTL Line Off (#) 0  
Delay (sec) 5  
Analog:Digital Module TTL Line On (#) 0  
SyringePump Delay Until Done

### ' DEGRADATION MEASUREMENTS

#### ' Trigger voltammogram acquisition for time pt "0 min".

Analog:Digital Module TTL Line Off (#) 0  
Delay (sec) 2  
Analog:Digital Module TTL Line On (#) 0

#### ' Trigger voltammogram acquisitions for time pts "1-3min".

Loop Start (#) 3  
Delay (sec) 56  
Analog:Digital Module TTL Line Off (#) 0  
Delay (sec) 2  
Analog:Digital Module TTL Line On (#) 0  
Loop End

### ' Discard solution in pump & holding coil.

Valve waste  
SyringePump Flowrate (microliter/sec) 100  
SyringePump Empty  
SyringePump Delay Until Done

### ' BACKGROUND MEASUREMENT

#### ' Prime blank inlet.

SyringePump Valve In  
SyringePump Flowrate (microliter/sec) 50  
SyringePump Aspirate (microliter) 100  
SyringePump Delay Until Done  
SyringePump Valve Out  
Valve blank  
SyringePump Flowrate (microliter/sec) 50  
SyringePump Aspirate (microliter) 20  
SyringePump Delay Until Done  
SyringePump Flowrate (microliter/sec) 50  
Valve waste  
SyringePump Empty  
SyringePump Delay Until Done

#### ' Fill pump. Aspirate blank.

SyringePump Valve In  
SyringePump Flowrate (microliter/sec) 100  
SyringePump Aspirate (microliter) 500  
SyringePump Delay Until Done  
SyringePump Valve Out  
Valve blank  
SyringePump Flowrate (microliter/sec) 50  
SyringePump Aspirate (microliter) 500  
SyringePump Delay Until Done

#### ' Dispense blank solution into flowcell.

#### ' Trigger conditioning voltammogram.

SyringePump Flowrate (microliter/sec) 10  
Valve flowcell  
SyringePump Dispense (microliter) 200  
Delay (sec) 2  
Analog:Digital Module TTL Line Off (#) 0  
Delay (sec) 5  
Analog:Digital Module TTL Line On (#) 0  
SyringePump Delay Until Done

#### ' Trigger voltammogram acquisition for bkg measurement.

Analog:Digital Module TTL Line Off (#) 0  
Delay (sec) 5  
Analog:Digital Module TTL Line On (#) 0

### ' Discard solution in pump & holding coil.

Valve waste  
SyringePump Flowrate (microliter/sec) 50  
SyringePump Empty  
SyringePump Delay Until Done

### ' Discard bead column.

Insert File C:\Bead flush.fia

## ESI Table 2: Software protocol for loading beads.

### ' Define ports.

Hardware Settings portname (number, string) 1, waste  
Hardware Settings portname (number, string) 2, flowcell  
Hardware Settings portname (number, string) 3, blank  
Hardware Settings portname (number, string) 4, sample  
Hardware Settings portname (number, string) 5, spare  
Hardware Settings portname (number, string) 6, beads

### ' Fill syringe.

SyringePump Valve In  
SyringePump Flowrate (microliter/sec) 30  
SyringePump Aspirate (microliter) 200  
SyringePump Delay Until Done

### ' Flush bead inlet. Aspirate beads.

SyringePump Valve Out  
Valve beads  
SyringePump Flowrate (microliter/sec) 30  
' Push old solution in inlet tubing to bead vial.  
' 20 uL = inlet tubing vol (10 cm of 0.02" i.d.)  
SyringePump Dispense (microliter) 20  
SyringePump Delay Until Done  
SyringePump Aspirate (microliter) 80  
SyringePump Delay Until Done

### ' Dispense beads into flowcell.

SyringePump Flowrate (microliter/sec) 10  
Valve flowcell  
SyringePump Empty  
SyringePump Delay Until Done

### ' Discard possible excess beads to waste.

SyringePump Valve In  
SyringePump Flowrate (microliter/sec) 30  
SyringePump Aspirate (microliter) 200  
SyringePump Delay Until Done  
SyringePump Valve Out  
SyringePump Flowrate (microliter/sec) 50  
Valve waste  
SyringePump Empty  
SyringePump Delay Until Done

### ESI Table 3: Software protocol for discarding beads.

#### ' Define ports.

Hardware Settings portname (number, string) 1, waste  
Hardware Settings portname (number, string) 2, flowcell  
Hardware Settings portname (number, string) 3, blank  
Hardware Settings portname (number, string) 4, sample  
Hardware Settings portname (number, string) 5, spare  
Hardware Settings portname (number, string) 6, beads

#### ' Fill pump.

SyringePump Valve In  
SyringePump Flowrate (microliter/sec) 50  
SyringePump Aspirate (microliter) 400  
SyringePump Delay Until Done

#### ' Aspirate beads out of flowcell.

SyringePump Valve Out  
Valve flowcell  
SyringePump Flowrate (microliter/sec) 20  
SyringePump Aspirate (microliter) 200  
SyringePump Delay Until Done

#### ' Discard beads to waste.

Valve waste  
SyringePump Flowrate (microliter/sec) 50  
SyringePump Dispense (microliter) 600  
SyringePump Delay Until Done

#### ' Fill pump.

SyringePump Valve In  
SyringePump Flowrate (microliter/sec) 50  
SyringePump Aspirate (microliter) 600  
SyringePump Delay Until Done

#### ' Push possible remaining beads out of flowcell.

SyringePump Valve Out  
Valve flowcell  
  
SyringePump Flowrate (microliter/sec) 300  
  
Loop Start (#) 5  
    SyringePump Aspirate (microliter) 2  
    SyringePump Delay Until Done  
    SyringePump Dispense (microliter) 100  
    SyringePump Delay Until Done  
Loop End  
  
SyringePump Flowrate (microliter/sec) 200  
SyringePump Empty  
SyringePump Delay Until Done
